# Supplementary material
Source: PubMed Central journal article supplement (PMC5337170)

A

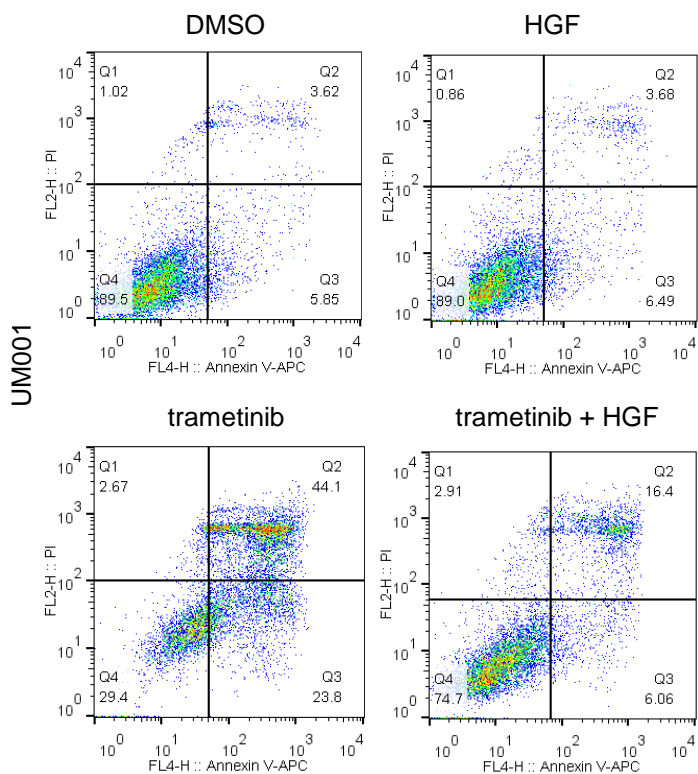

B

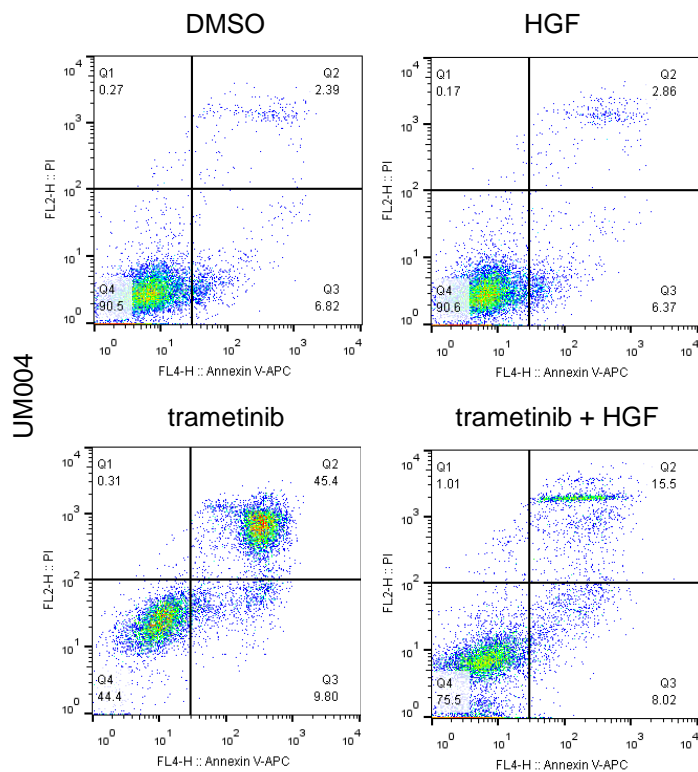

A

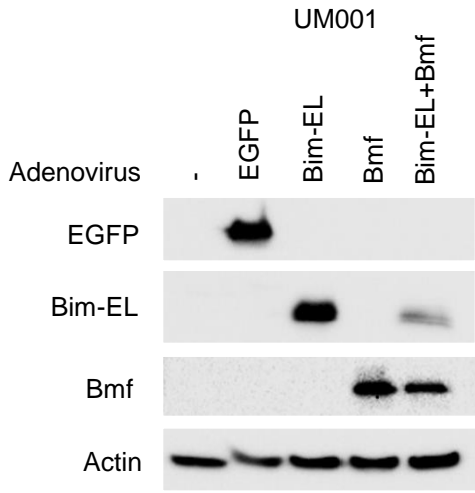

B

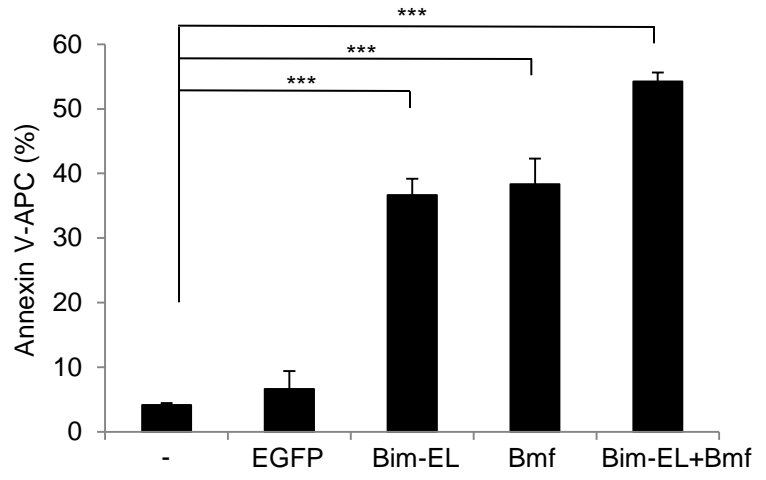

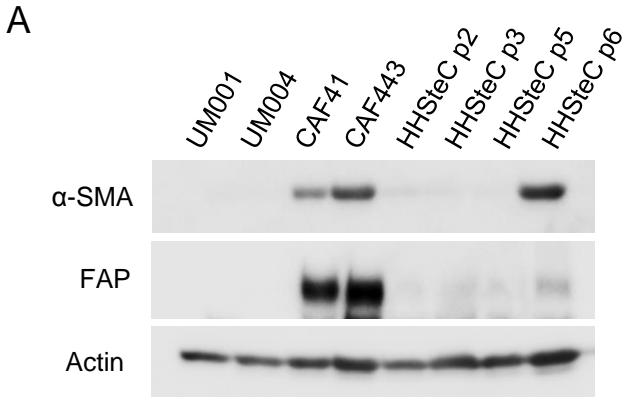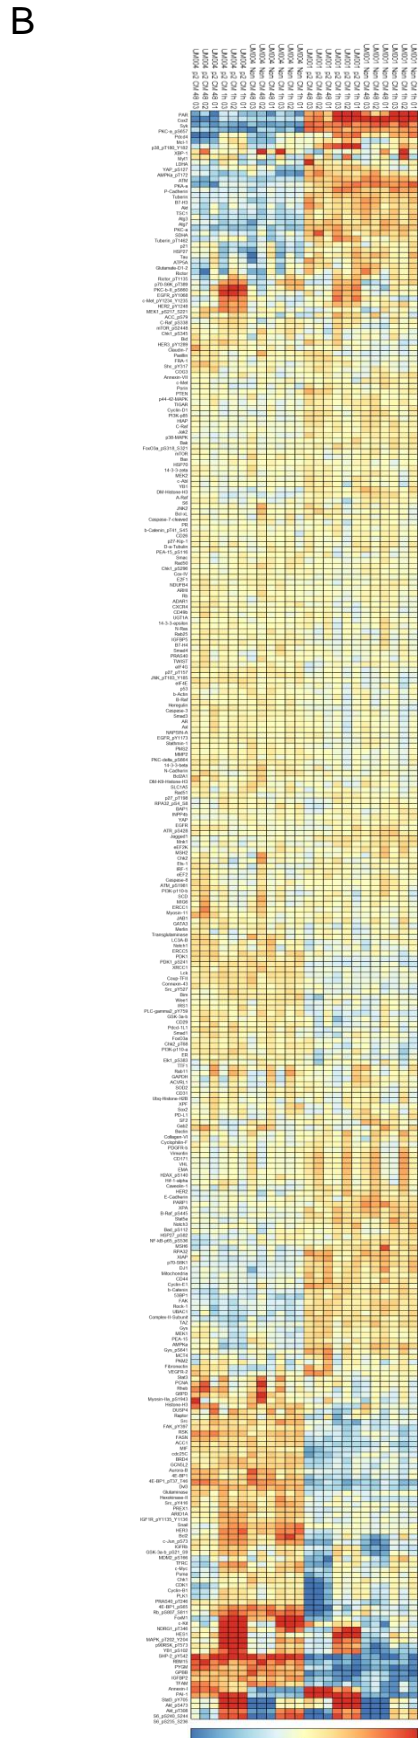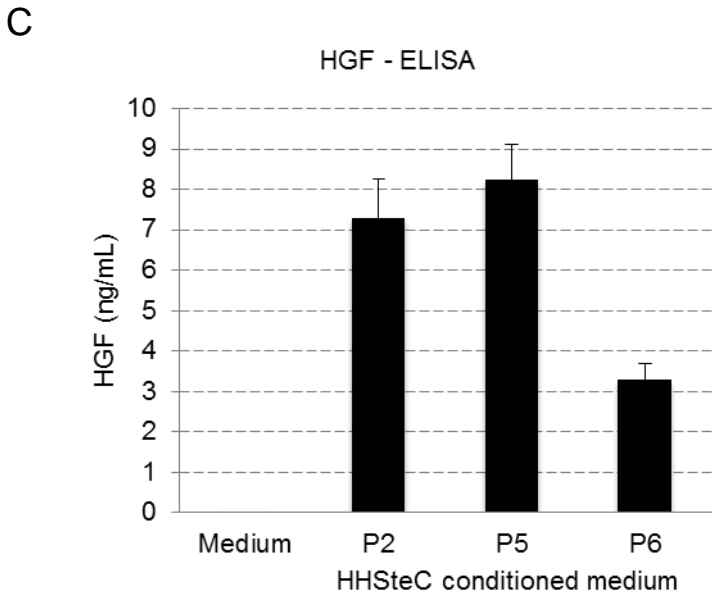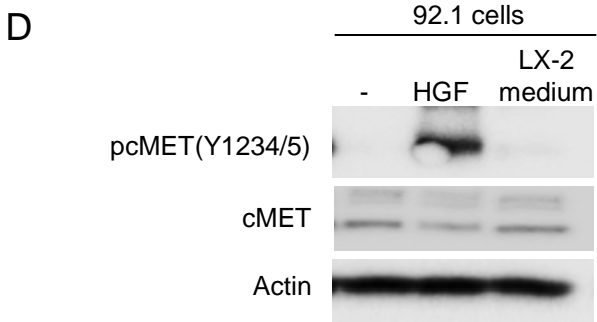

Migration assay

Invasion assay

Non-conditioned  
medium

Stellate cell  
conditioned medium

Non-conditioned  
medium

Stellate cell  
conditioned medium

UM001

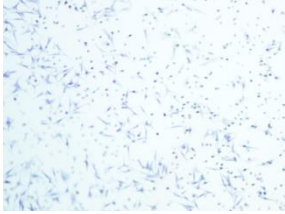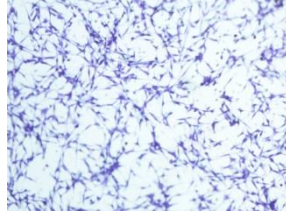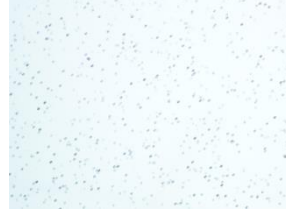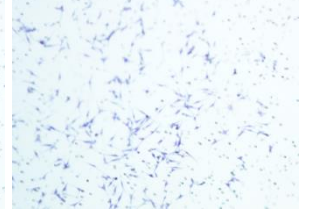

UM004

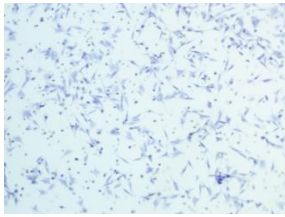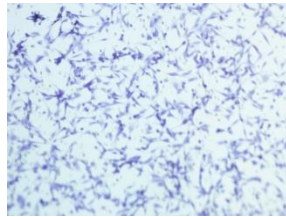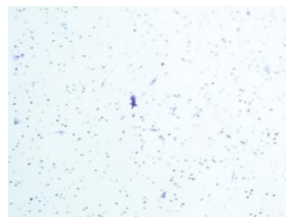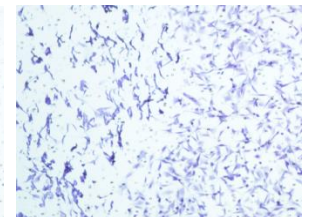

A

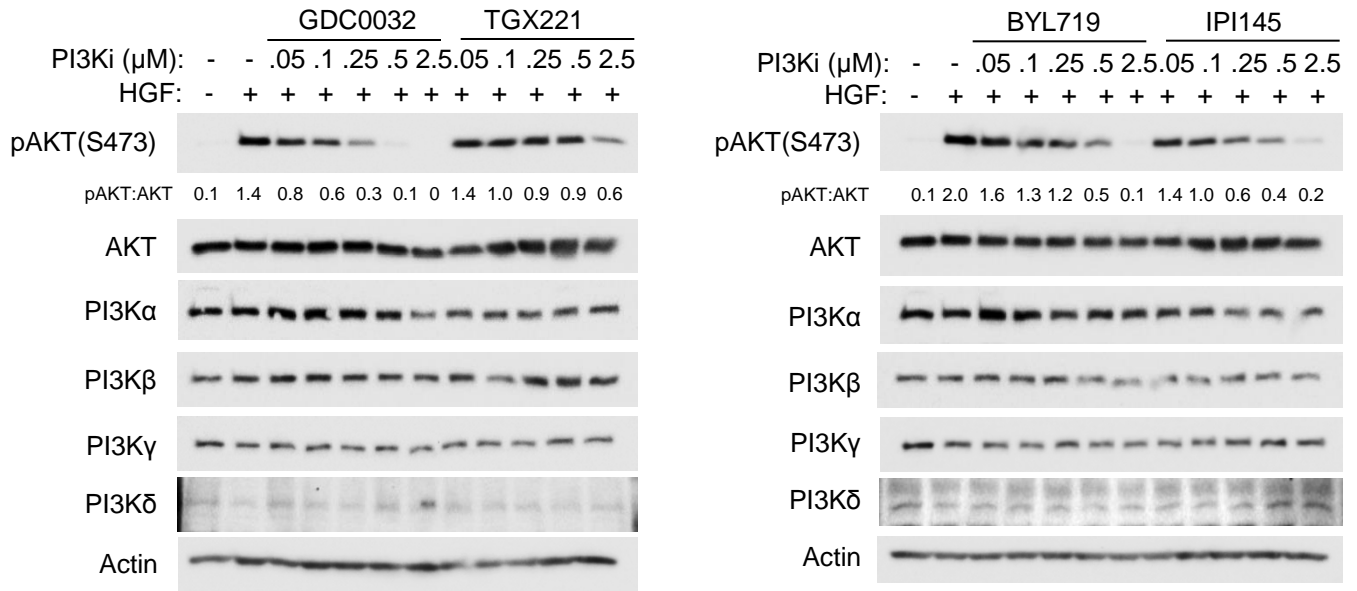

B

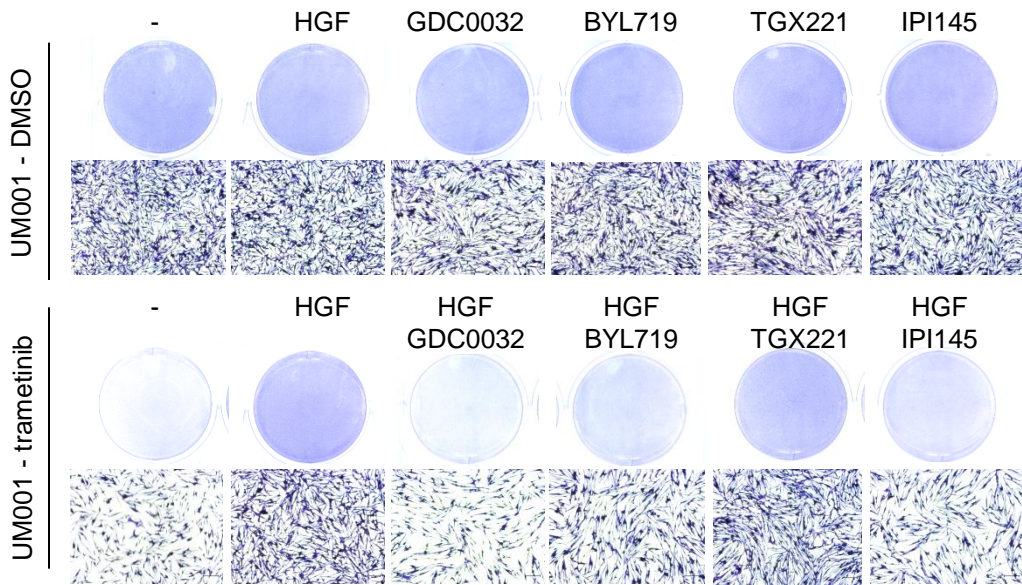

Supplement: NIHMS837900-supplement-1.pdf [file NIHMS837900-supplement-1.pdf]
