# Supplementary material
Source: PubMed Central journal article supplement (PMC5337170)
Supplement: NIHMS837900-supplement-3.pdf [file NIHMS837900-supplement-3.pdf]

Supplemental Table 1: Patient characteristics and treatment history.

| Tumor number | Patient's gender | Age | Treatment for primary UM | Previous treatment (Liver-directed)                               | Previous treatment (Others) | Molecular characteristics of metastatic UM | Tumor source                            |
|--------------|------------------|-----|--------------------------|-------------------------------------------------------------------|-----------------------------|--------------------------------------------|-----------------------------------------|
| EX-Pt#4      | Female           | 53  | Radioactive plaque       | Immunoembolization, TACE with BCNU, SIR-Spheres® 90Y microspheres | Ipilimumab                  | GNAQ Q209P                                 | Right axillary, subcutaneous metastasis |

BCNU: 1,3-bis(2-chloroethyl)-1-nitrosourea

DEBDOX: Doxorubicin-eluting beads
